# Supplementary material
Source: PubMed Central journal article supplement (PMC4946627)
Supplement: NIHMS54383-supplement-Supplemental_Material.pdf [file NIHMS54383-supplement-Supplemental_Material.pdf]

## **SUPPLEMENTAL MATERIAL**

### **A population-based study of disability and institutionalisation after TIA and stroke: 10-year results of the Oxford Vascular Study**

Ramon Luengo-Fernandez, Nicola L.M. Paul, Alastair M. Gray, Sarah T. Pendlebury, Linda M. Bull, Sarah J.V. Welch, Fiona C. Cuthberston, Peter M. Rothwell, on behalf of the Oxford Vascular Study

**Supplementary Table I. Modified Rankin Score (mRS) after index TIA or stroke**

|                            | <b>Stroke patients</b>     |                |                 |               |                 |                |
|----------------------------|----------------------------|----------------|-----------------|---------------|-----------------|----------------|
|                            | <b>Pre-morbid</b>          | <b>1 month</b> | <b>6 months</b> | <b>1 year</b> | <b>2 years*</b> | <b>5 years</b> |
| <b>Cases with mRS data</b> | 748                        | 634            | 565             | 523           | 318             | 339            |
| <b>mRS</b>                 |                            |                |                 |               |                 |                |
| 0                          | 253 (34)                   | 62 (10)        | 68 (12)         | 43 (8)        | 25 (8)          | 41 (12)        |
| 1                          | 237 (32)                   | 161 (25)       | 178 (32)        | 166 (32)      | 97 (31)         | 91 (27)        |
| 2                          | 104 (14)                   | 138 (22)       | 111 (20)        | 128 (25)      | 74 (23)         | 75 (22)        |
| 3                          | 110 (15)                   | 120 (19)       | 131 (23)        | 124 (24)      | 76 (24)         | 80 (24)        |
| 4                          | 37 (5)                     | 90 (14)        | 49 (9)          | 42 (8)        | 28 (9)          | 32 (9)         |
| 5                          | 7 (1)                      | 63 (10)        | 28 (5)          | 20 (4)        | 18 (6)          | 20 (6)         |
| <b>&gt;2</b>               | 154 (21)                   | 273 (43)       | 208 (37)        | 186 (36)      | 122 (38)        | 132 (39)       |
|                            | <b>TIA patients, n (%)</b> |                |                 |               |                 |                |
|                            | <b>Pre-morbid</b>          | <b>1 month</b> | <b>6 months</b> | <b>1 year</b> | <b>2 years*</b> | <b>5 years</b> |
| <b>Cases with mRS data</b> | 440                        | 430            | 413             | 398           | 215             | 256            |
| <b>mRS</b>                 |                            |                |                 |               |                 |                |
| 0                          | 168 (38)                   | 118 (27)       | 116 (28)        | 96 (24)       | 49 (23)         | 61 (24)        |
| 1                          | 157 (36)                   | 180 (42)       | 158 (38)        | 162 (41)      | 76 (35)         | 96 (38)        |
| 2                          | 52 (12)                    | 60 (14)        | 61 (15)         | 61 (15)       | 44 (20)         | 39 (15)        |
| 3                          | 51 (12)                    | 43 (10)        | 57 (14)         | 53 (13)       | 32 (15)         | 43 (17)        |
| 4                          | 11 (3)                     | 20 (5)         | 15 (4)          | 18 (5)        | 9 (4)           | 12 (5)         |
| 5                          | 1 (<1)                     | 9 (2)          | 6 (1)           | 8 (2)         | 5 (2)           | 5 (2)          |
| <b>&gt;2</b>               | 63 (16)                    | 72 (17)        | 78 (19)         | 79 (20)       | 46 (21)         | 60 (23)        |

\*2 year follow-ups were discontinued for patients recruited on or after 1 April 2005. As a result, 2-year disability data was unavailable for 156 TIA patients and 184 stroke patients

Supplementary Table II. Death, disability (mRS>2) and new disability following index stroke, by stroke type

|                                  | Death        |             | Disability          |                | Death or disability          |                           | New disability                                         |                      |
|----------------------------------|--------------|-------------|---------------------|----------------|------------------------------|---------------------------|--------------------------------------------------------|----------------------|
|                                  | No. patients | Death n (%) | Cases with mRS data | Disabled n (%) | Cases with mRS data or death | Death or disability n (%) | Non-disabled cases at baseline with mRS follow-up data | New disability n (%) |
| <b>Ischaemic stroke</b>          |              |             |                     |                |                              |                           |                                                        |                      |
| Pre-morbid                       | 618          | N/A         | 618                 | 123 (20)       | 618                          | 123 (20)                  | N/A                                                    | N/A                  |
| 1 month                          | 618          | 49 (8)      | 562                 | 233 (41)       | 611                          | 282 (46)                  | 464                                                    | 151 (32)             |
| 6 months                         | 618          | 99 (16)     | 506                 | 183 (36)       | 602                          | 282 (47)                  | 434                                                    | 131 (30)             |
| 1 year                           | 618          | 127 (21)    | 470                 | 167 (36)       | 597                          | 294 (49)                  | 411                                                    | 118 (29)             |
| 2 years*                         | 618          | 158 (26)    | 294                 | 113 (38)       | 452                          | 271 (60)                  | 262                                                    | 87 (33)              |
| 5 years                          | 618          | 266 (43)    | 302                 | 122 (40)       | 568                          | 388 (68)                  | 277                                                    | 101 (36)             |
| <b>Intracerebral haemorrhage</b> |              |             |                     |                |                              |                           |                                                        |                      |
| Pre-morbid                       | 54           | N/A         | 54                  | 9 (17)         | 54                           | 9 (17)                    | N/A                                                    | N/A                  |
| 1 month                          | 54           | 23 (43)     | 31                  | 20 (65)        | 54                           | 43 (80)                   | 26                                                     | 15 (58)              |
| 6 months                         | 54           | 26 (48)     | 26                  | 12 (46)        | 52                           | 38 (73)                   | 21                                                     | 7 (33)               |
| 1 year                           | 54           | 27 (50)     | 23                  | 10 (43)        | 50                           | 37 (74)                   | 21                                                     | 8 (38)               |
| 2 years*                         | 54           | 28 (52)     | 9                   | 5 (56)         | 37                           | 33 (89)                   | 7                                                      | 3 (43)               |
| 5 years                          | 54           | 34 (63)     | 16                  | 6 (38)         | 50                           | 40 (80)                   | 15                                                     | 5 (33)               |
| <b>Subarachnoid haemorrhage</b>  |              |             |                     |                |                              |                           |                                                        |                      |
| Pre-morbid                       | 38           | N/A         | 38                  | 4 (11)         | 38                           | 4 (11)                    | N/A                                                    | N/A                  |
| 1 month                          | 38           | 15 (39)     | 23                  | 9 (39)         | 38                           | 24 (63)                   | 23                                                     | 9 (39)               |
| 6 months                         | 38           | 18 (47)     | 20                  | 4 (20)         | 38                           | 22 (58)                   | 20                                                     | 4 (20)               |
| 1 year                           | 38           | 19 (50)     | 19                  | 4 (21)         | 38                           | 23 (61)                   | 19                                                     | 4 (21)               |
| 2 years*                         | 38           | 19 (50)     | 13                  | 2 (15)         | 32                           | 21 (66)                   | 13                                                     | 2 (15)               |
| 5 years                          | 38           | 19 (50)     | 17                  | 2 (12)         | 36                           | 21 (58)                   | 17                                                     | 2 (12)               |
| <b>Unknown stroke</b>            |              |             |                     |                |                              |                           |                                                        |                      |
| Pre-morbid                       | 38           | N/A         | 38                  | 18 (47)        | 38                           | 18 (47)                   | N/A                                                    | N/A                  |
| 1 month                          | 38           | 20 (53)     | 18                  | 11 (61)        | 38                           | 31 (82)                   | 10                                                     | 3 (30)               |
| 6 months                         | 38           | 22 (58)     | 16                  | 9 (56)         | 38                           | 31 (82)                   | 10                                                     | 3 (30)               |
| 1 year                           | 38           | 26 (68)     | 11                  | 5 (45)         | 37                           | 31 (84)                   | 9                                                      | 3 (33)               |
| 2 years*                         | 38           | 27 (71)     | 2                   | 2 (100)        | 29                           | 29 (100)                  | 0                                                      | N/A                  |
| 5 years                          | 38           | 32 (84)     | 4                   | 2 (50)         | 36                           | 34 (94)                   | 4                                                      | 2 (50)               |

\*2 year follow-ups were discontinued for patients recruited on or after 1 April 2005. As a result, 2-year disability data was unavailable for 184 stroke patients
